# Supplementary material for: The anxiolytic effect of probiotics: A systematic review and meta-analysis of the clinical and preclinical literature
Source: PubMed Central journal article supplement (PMC6010276; doi:10.1371/journal.pone.0199041), 2018-06-20

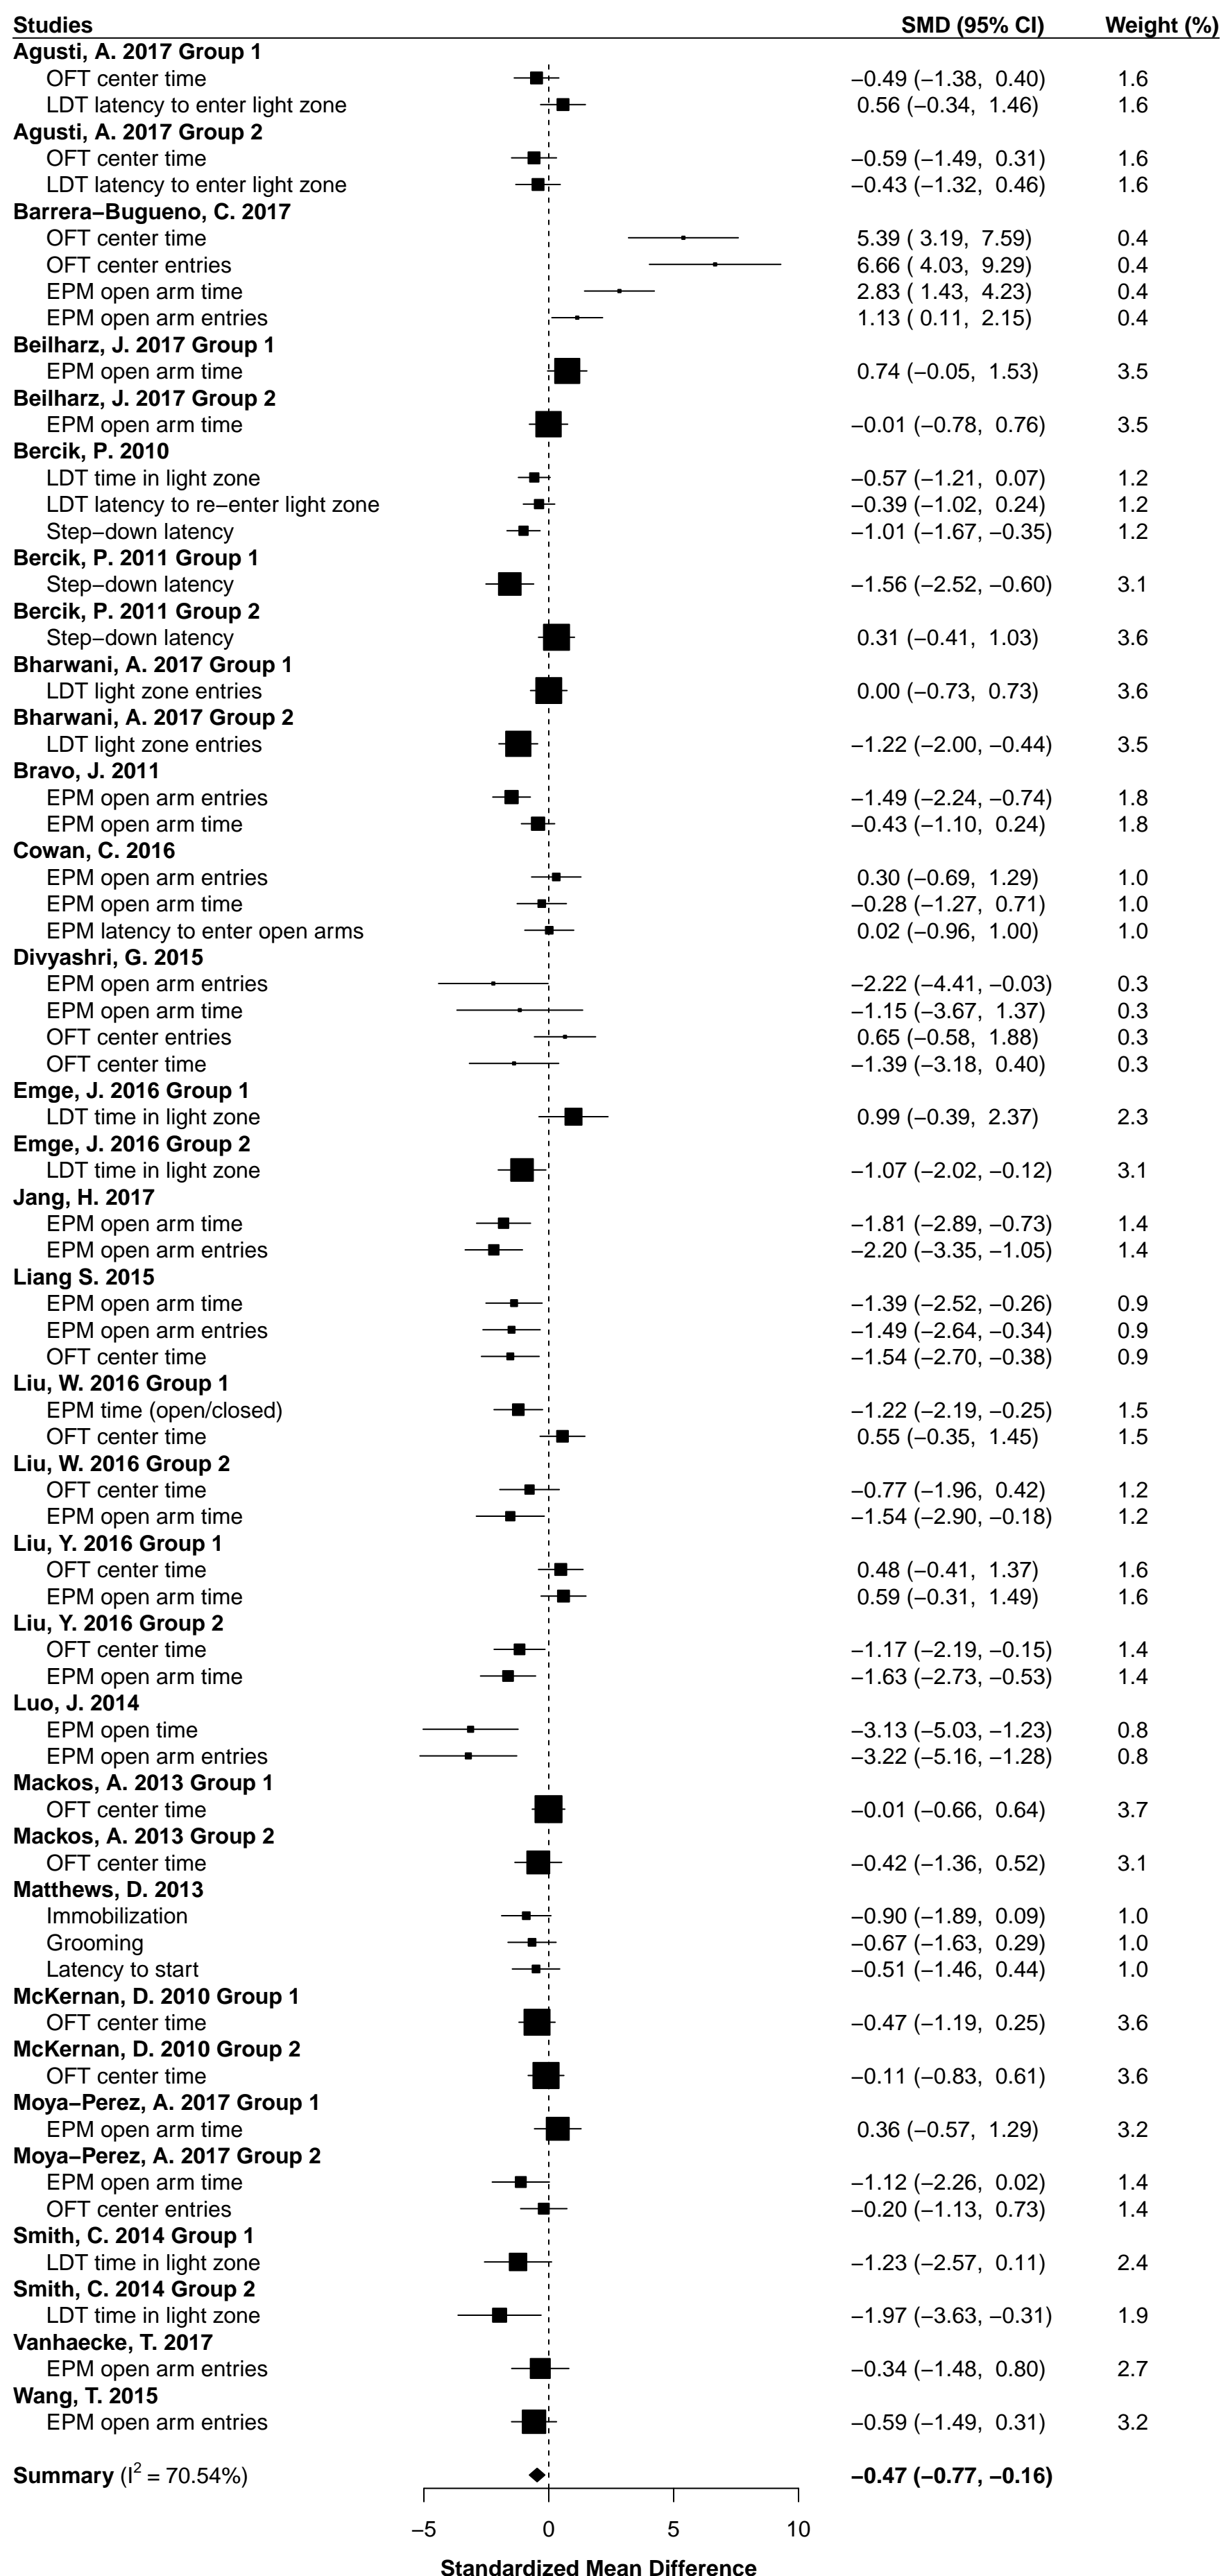

Supplement: pone.0199041.s003.pdf [file pone.0199041.s003.pdf]
