# Supplementary material for: The anxiolytic effect of probiotics: A systematic review and meta-analysis of the clinical and preclinical literature
Source: PLoS One. 2018 Jun 20;13(6):e0199041. doi: 10.1371/journal.pone.0199041 (PMC6010276; doi:10.1371/journal.pone.0199041)
Supplement: S1 Data — (CSV) [file pone.0199041.s004.csv]

study	author	year	tx_dur	tx_cfu_billions	tx_n	c_n	hedges	se	paradigm	measure	rodent	clinical
1	Agusti, A.	2017	98	1	10	10	-0.491	0.456	Open field test	Time spent in center	mouse	0
1	Agusti, A.	2017	98	1	10	10	0.566	0.458	Light-dark test	Latency to enter light box	mouse	0
2	Agusti, A.	2017	98	1	10	10	-0.589	0.459	Open field test	Time spent in center	mouse	1
2	Agusti, A.	2017	98	1	10	10	-0.43	0.454	Light-dark test	Latency to enter light box	mouse	1
3	Barrera-Bugueno, C.	2017	98	0.0003	9	9	5.392	1.121	Open field test	Time spent in center	rat	0
3	Barrera-Bugueno, C.	2017	98	0.0003	9	9	6.663	1.342	Open field test	Center Entries	rat	0
3	Barrera-Bugueno, C.	2017	98	0.0003	9	9	2.835	0.713	Elevated maze plus	Time in open arms	rat	0
3	Barrera-Bugueno, C.	2017	98	0.0003	9	9	1.143	0.518	Elevated maze plus	Open arm entries	rat	0
4	Beilharz, J.	2017	36	7.5	20	10	0.739	0.401	Elevated maze plus	Time in open arms	rat	0
5	Beilharz, J.	2017	36	7.5	19	10	-0.009	0.391	Elevated maze plus	Time in open arms	rat	1
6	Bercik, P.	2010	30	10	26	16	-0.577	0.325	Light-dark test	Time in light box	mouse	1
6	Bercik, P.	2010	30	10	26	16	-0.389	0.321	Light-dark test	Latency to re-enter light box	mouse	1
6	Bercik, P.	2010	30	10	26	16	-1.005	0.338	Step-down test	Step down latency	mouse	1
7	Bercik, P.	2011	14	10	11	12	-1.557	0.488	Step-down test	Step down latency	mouse	1
8	Bercik, P.	2011	14	10	15	15	0.307	0.368	Step-down test	Step down latency	mouse	1
9	Bharwani, A.	2017	28	1.67	12	18	0	0.373	Light-dark test	Entries into light zone	mouse	0
10	Bharwani, A.	2017	28	1.67	16	15	-1.224	0.396	Light-dark test	Entries into light zone	mouse	1
11	Bravo, J.	2011	28	1	16	20	-1.493	0.384	Elevated maze plus	Open arm entries	mouse	0
11	Bravo, J.	2011	28	1	16	20	-0.427	0.34	Elevated maze plus	Time in open arms	mouse	0
12	Cowan, C.	2016	13	1	8	8	0.296	0.504	Elevated maze plus	Open arm entries	rat	0
12	Cowan, C.	2016	13	1	8	8	-0.276	0.503	Elevated maze plus	Time in open arms	rat	0
12	Cowan, C.	2016	13	1	8	8	0.019	0.5	Elevated maze plus	Latency to enter open arms	rat	0
13	Divyashri, G.	2015	28	0.06667	18	6	-2.217	1.118	Elevated maze plus	Open arm entries	mouse	0
13	Divyashri, G.	2015	28	0.06667	18	6	-1.165	1.284	Elevated maze plus	Time in open arms	mouse	0
13	Divyashri, G.	2015	28	0.06667	18	6	0.647	0.625	Open field test	Center Entries	mouse	0
13	Divyashri, G.	2015	28	0.06667	18	6	-1.387	0.912	Open field test	Time spent in center	mouse	0
14	Emge, J.	2016	14	2	4	6	0.989	0.705	Light-dark test	Time in light box	mouse	0
15	Emge, J.	2016	14	2	9	11	-1.066	0.487	Light-dark test	Time in light box	mouse	1
16	Jang, H.	2017	49	2.067	18	6	-1.808	0.551	Elevated maze plus	Time in open arms	mouse	1
16	Jang, H.	2017	49	2.067	18	6	-2.196	0.585	Elevated maze plus	Open arm entries	mouse	1
17	Liang S.	2015	22	1	8	8	-1.385	0.574	Elevated maze plus	Time in open arms	rat	1
17	Liang S.	2015	22	1	8	8	-1.493	0.585	Elevated maze plus	Open arm entries	rat	1
17	Liang S.	2015	22	1	8	8	-1.539	0.59	Open field test	Time spent in center	rat	1
18	Liu, W.	2016	16	1	10	10	-1.219	0.496	Elevated maze plus	Ratio of time spent in open/closed arms	mouse	0
18	Liu, W.	2016	16	1	10	10	0.548	0.458	Open field test	Time spent in center	mouse	0
19	Liu, W.	2016	16	1	6	6	-0.77	0.608	Open field test	Time spent in center	mouse	0
19	Liu, W.	2016	16	1	6	6	-1.543	0.694	Elevated maze plus	Time in open arms	mouse	0
20	Liu, Y.	2016	28	1	10	10	0.484	0.455	Open field test	Time spent in center	mouse	1
20	Liu, Y.	2016	28	1	10	10	0.594	0.459	Elevated maze plus	Time in open arms	mouse	1
21	Liu, Y.	2016	28	1	9	9	-1.166	0.52	Open field test	Time spent in center	mouse	0
21	Liu, Y.	2016	28	1	9	9	-1.628	0.563	Elevated maze plus	Time in open arms	mouse	0
22	Luo, J.	2014	14	1	6	6	-3.131	0.97	Elevated maze plus	Time in open arms	rat	1
22	Luo, J.	2014	14	1	6	6	-3.222	0.989	Elevated maze plus	Open arm entries	rat	1
23	Mackos, A.	2013	12	0.15	18	18	-0.01	0.333	Open field test	Time spent in center	mouse	0
24	Mackos, A.	2013	12	0.15	9	9	-0.423	0.478	Open field test	Time spent in center	mouse	1
25	Matthews, D.	2013	21	0.00045	10	8	-0.903	0.504	Anxiety-related behavior	Immobilization	mouse	0
25	Matthews, D.	2013	21	0.00045	10	8	-0.669	0.491	Anxiety-related behavior	Grooming	mouse	0
25	Matthews, D.	2013	21	0.00045	10	8	-0.51	0.484	Anxiety-related behavior	Latency to start maze	mouse	0
26	McKernan, D.	2010	14	5	30	10	-0.47	0.369	Open field test	Time spent in center	rat	0
27	McKernan, D.	2010	14	5	30	10	-0.114	0.365	Open field test	Time spent in center	rat	0
28	Moya-Perez, A.	2017	20	0.1	9	9	0.357	0.476	Elevated maze plus	Time in open arms	mouse	0
29	Moya-Perez, A.	2017	20	0.1	9	9	-1.818	0.583	Elevated maze plus	Time in open arms	mouse	1
29	Moya-Perez, A.	2017	20	0.1	9	9	-0.198	0.473	Open field test	Center Entries	mouse	1
30	Smith, C.	2014	28	6	8	4	-1.231	0.685	Light-dark test	Time in light box	mouse	0
31	Smith, C.	2014	28	6	5	5	-1.969	0.848	Light-dark test	Time in light box	mouse	1
32	Vanhaecke, T.	2017	15	1	6	6	-0.3449	0.584	Elevated maze plus	Open arm entries	rat	0
33	Wang, T.	2015	30	1	10	10	-0.594	0.459	Elevated maze plus	Open arm entries	rat	1
