# Supplementary material for: The anxiolytic effect of probiotics: A systematic review and meta-analysis of the clinical and preclinical literature
Source: PLoS One. 2018 Jun 20;13(6):e0199041. doi: 10.1371/journal.pone.0199041 (PMC6010276; doi:10.1371/journal.pone.0199041)
Supplement: S2 Data — (CSV) [file pone.0199041.s005.csv]

study	author	year	tx_dur	tx_cfu_billions	tx_n	c_n	hedges	se	scale	clinical
1	Kato-Kataoka, A.	2016	56	100	23	24	-0.148	0.292	STAI - State	0
2	Kelly, J.	2017	28	1	29	29	0.178	0.187	STAI - State	0
2	Kelly, J.	2017	28	1	29	29	0.081	0.186	STAI - Trait	0
2	Kelly, J.	2017	28	1	29	29	0	0.186	BAI	0
3	Lyra, A.	2016	84	5	218	114	-0.015	0.116	HADS - Anxiety	1
4	Marcos, A.	2004	42	42	73	63	-0.239	0.173	STAI - State	0
4	Marcos, A.	2004	42	42	73	63	-0.032	0.172	STAI - Trait	0
5	Messaoudi, M.	2011	30	3	26	29	0	0.27	HADS - Anxiety	0
5	Messaoudi, M.	2011	30	3	26	29	0	0.27	HSCL 90 - Anxiety	0
6	Romijn, A.	2017	56	3	40	39	0.362	0.227	DASS - Anxiety	1
7	Simren, M.	2010	56	20	33	34	0	0.244	HADS - Anxiety	1
8	Takada, M.	2017	77	10	48	46	-0.167	0.207	STAI - State	0
9	Takada, M.	2016	56	10	70	70	0.184	0.169	STAI - State	0
10	Yang, H.	2016	14		10	10	-3.208	0.721	HAMA	1
11	Steenbergen, L.	2015	28	5	20	20	-0.17	0.317	BAI	0
12	Lorenzo-Zuniga, V.	2014	42	9	47	24	-0.576	0.256	VSI	1
13	Pinto-Sanchez, M.	2017	42	10	18	20	-0.157	0.325	HADS - Anxiety	1
13	Pinto-Sanchez, M.	2017	42	10	18	20	-0.502	0.331	STAI - State	1
13	Pinto-Sanchez, M.	2017	42	10	18	20	-0.273	0.327	STAI - Trait	1
14	Slykerman, R.	2017	365	6	192	187	-0.241	0.103	STAI - 6 item	0
